# Supplementary material for: PTM-Mamba: a PTM-aware protein language model with bidirectional gated Mamba blocks
Source: Springer Nature journal article supplement (doi:10.1038/s41592-025-02656-9), 2025-04-10
Supplement: MOESM1 [file 41592_2025_2656_MOESM1_ESM.pdf]

# **PTM-Mamba: a PTM-aware protein language model with bidirectional gated Mamba blocks**

---

In the format provided by the  
authors and unedited

## **Table of Contents**

### **Supplementary Figures**

1. PTM distributions in PTM-Mamba training set.
2. Length distribution of modified sequences in PTM-Mamba training dataset.
3. PTM-Mamba vs. PTM-Transformer training accuracy curve.
4. PTM-Mamba vs. baseline models on phosphorylation site prediction.
5. PTM-Mamba vs. baseline models on non-histone acetylation site prediction.

### **Supplementary Code**

1. PyTorch representative code for classification head used for phosphorylation site prediction.
2. PyTorch representative code for classification head used for non-histone acetylation site prediction.
3. PyTorch representative code for classification head used for disease-association and druggability prediction.
4. PyTorch representative code for classification head used for prediction of PTM effect on protein-protein interactions.

### **Supplementary Tables**

1. PTM tokens used in PTM-Mamba.
2. Hyperparameters used for embedding benchmarking tasks.

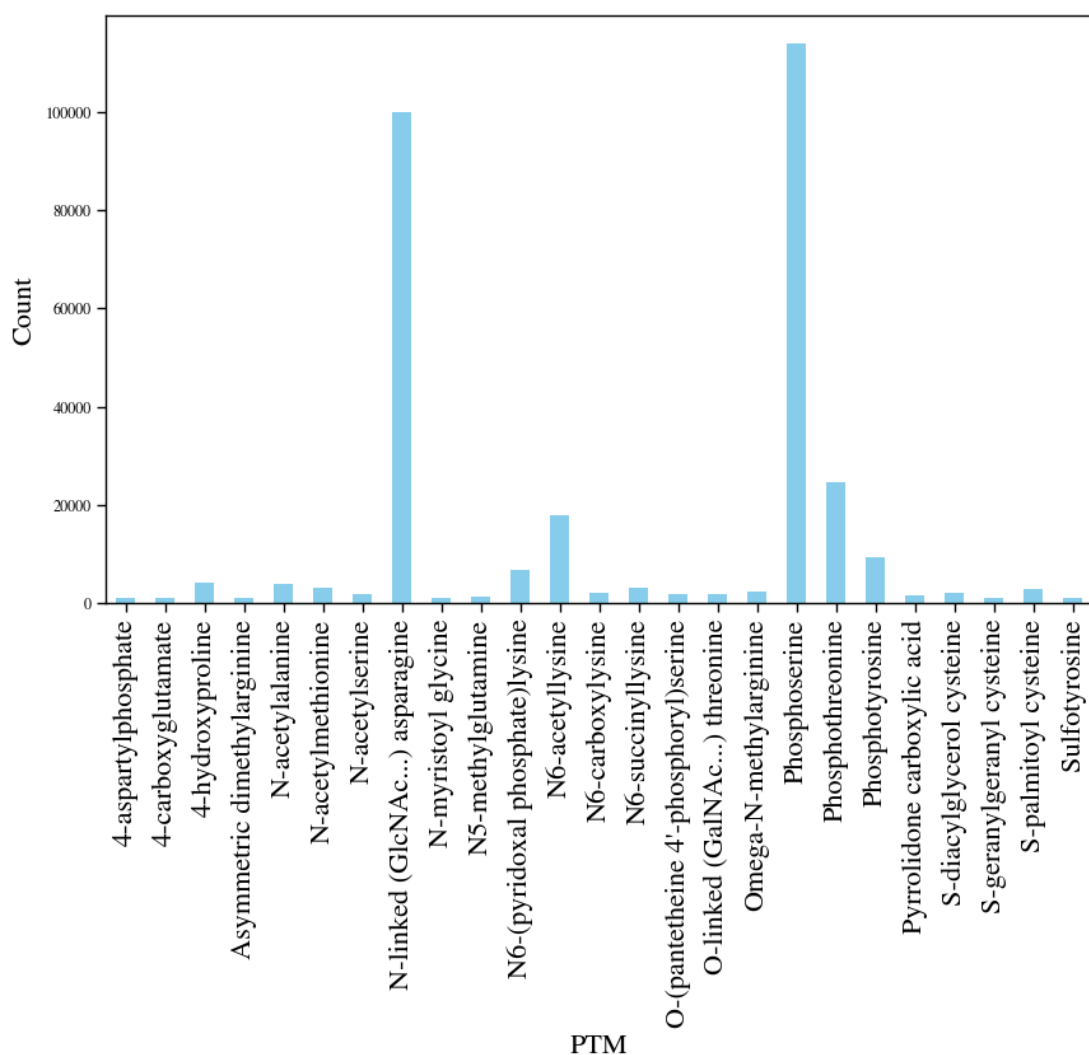

**Supplementary Figure 1: PTM distributions in PTM-Mamba training set.** A) The distribution of PTM annotations, demonstrating long-tail distributions. B) The distribution of the PTM sequence length, which is heavily centered at 400. A majority of PTM sequences are of length < 1500.

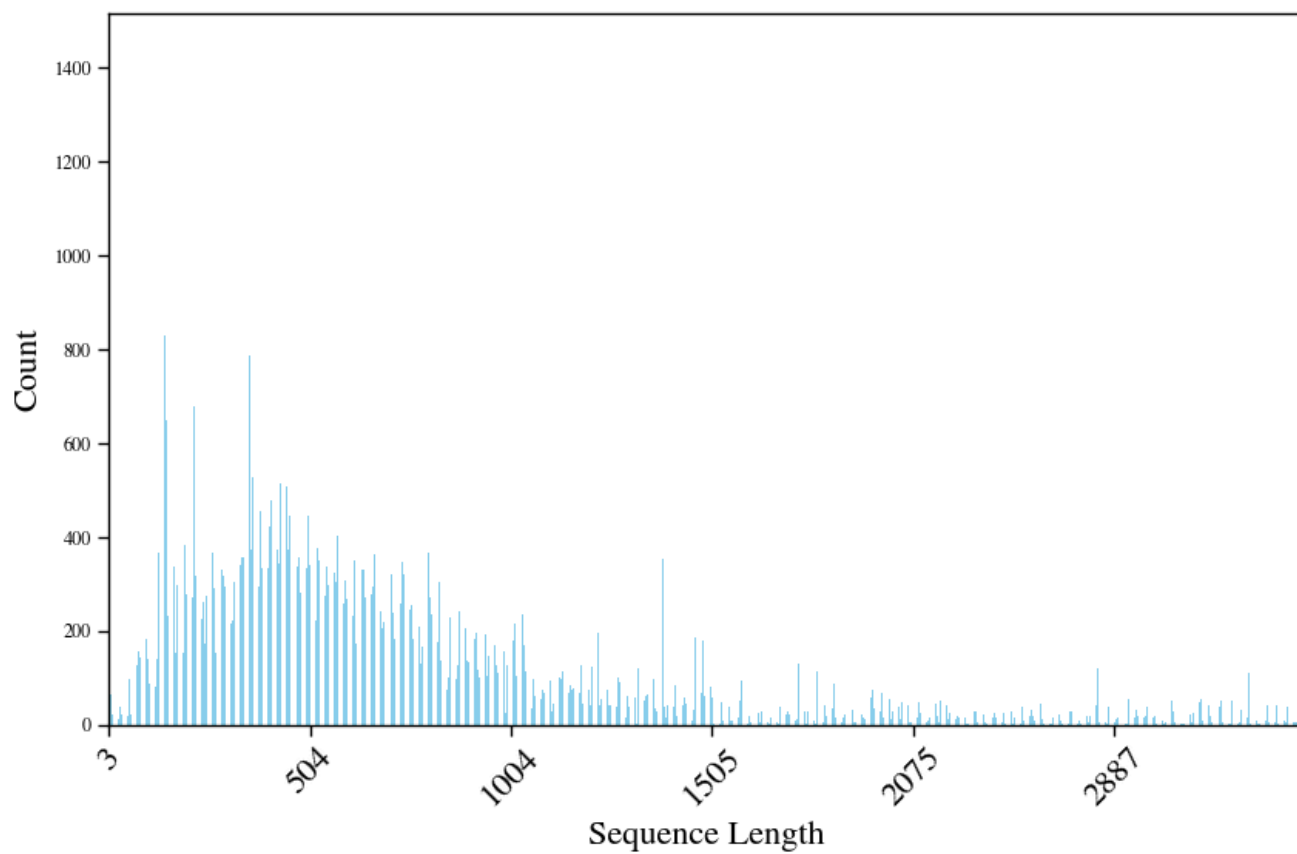

**Supplementary Figure 2: Length distribution of modified sequences in PTM-Mamba training dataset.**

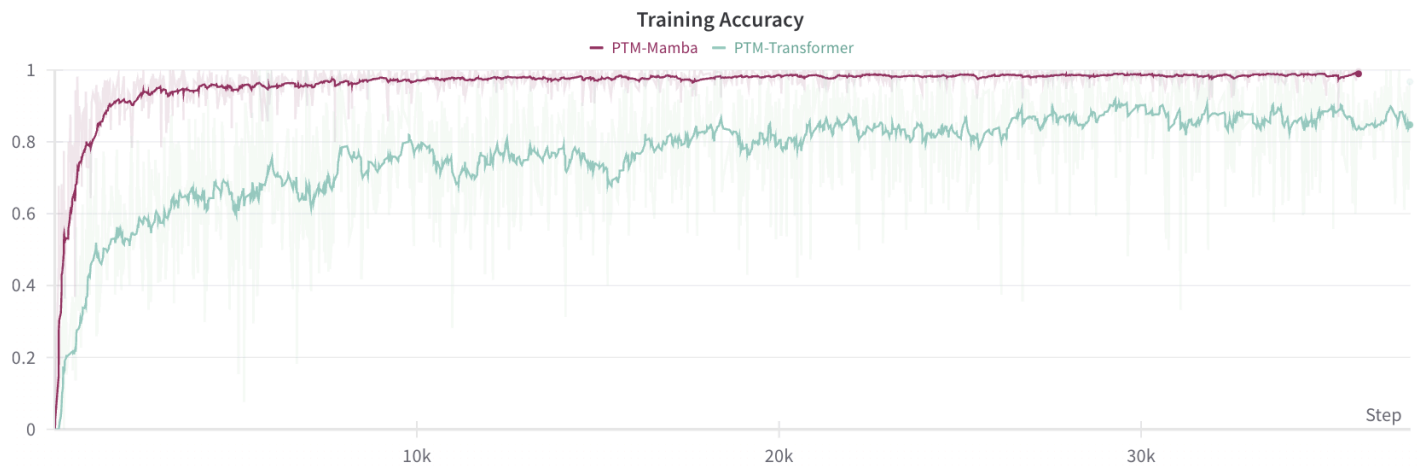

**Supplementary Figure 3: PTM-Mamba vs. PTM-Transformer training accuracy curve.** Iteration steps are shown on the x axis, and training accuracy on masked token prediction (0 to 1) are shown on the y axis.

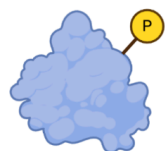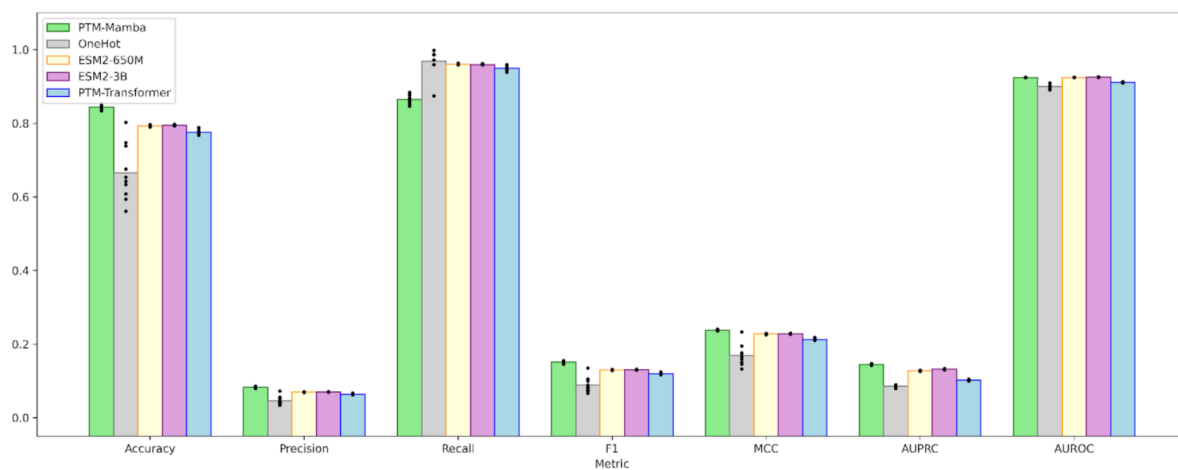

**Supplementary Figure 4: PTM-Mamba vs. baseline models on phosphorylation site prediction.** Training details can be found in the Methods section and representative code for the classification head can be found in Listing 1.

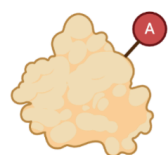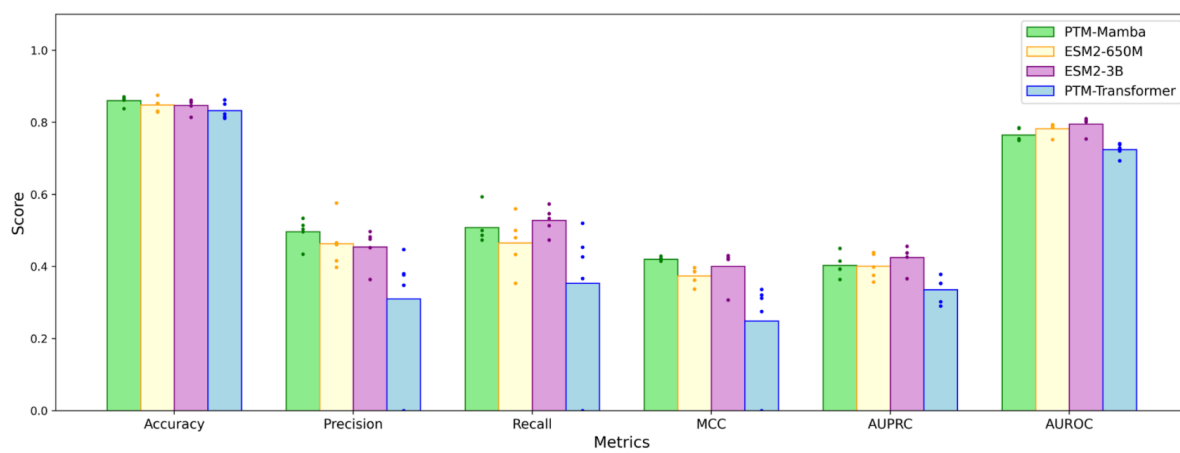

**Supplementary Figure 5: PTM-Mamba vs. baseline models on non-histone acetylation site prediction.** Training details can be found in the Methods section and representative code for the classification head can be found in Listing 2.

**Supplementary Code 1: PyTorch representative code for classification head used for phosphorylation site prediction.**

```
class ClassificationHead(nn.Module):

    def __init__(self, hidden_size=128, num_labels=2, dropout=0.1):
        super().__init__()
        self.dense = nn.Linear(hidden_size, hidden_size)
        self.dropout = nn.Dropout(dropout)
        self.out_proj = nn.Linear(hidden_size, num_labels)

    def forward(self, features, **kwargs):
        x = features
        x = self.dropout(x)
        x = self.dense(x)
        x = torch.tanh(x)
        x = self.dropout(x)
        x = self.out_proj(x)
        return x
```



**Supplementary Code 2. PyTorch representative code for classification head used for non-histone acetylation site prediction.** The graph neural network transformer (GNNTrans) architecture is described in Meng, et al.<sup>24</sup>

```
class GNNTrans(nn.Module):
    def __init__(self, input_dim, hidden_dim, num_layers):
        super().__init__()
        self.num_layers = num_layers
        self.loss_func = nn.BCELoss()
        self.convs = torch.nn.ModuleList(
            [TransformerConv(in_channels=input_dim, out_channels=hidden_dim, heads=1)]
+
            [TransformerConv(in_channels=hidden_dim, out_channels=hidden_dim, heads=1)
              for _ in range(num_layers-1)]
        )

        self.mlp = nn.Sequential(
            nn.Dropout(p=0.5),
            nn.Linear(hidden_dim, hidden_dim),
            nn.ReLU(inplace=True),
            nn.Dropout(p=0.5),
            nn.Linear(hidden_dim, 64),
            nn.ReLU(inplace=True),
            nn.Dropout(p=0.3),
            nn.Linear(64, 1),
            nn.Sigmoid()
        )

    def get_conv_result(self, x, edge_index):
        for i in range(self.num_layers):
            x = self.convs[i](x=x, edge_index=edge_index)
            x = F.relu(x, inplace=True)
        return x

    def forward(self, data):
        x, edge_index, batch = data.emb, data.edge_index, data.batch
        idx = (data.ptr + int(len(data.seq[0]) / 2))[:-1]
        x = self.get_conv_result(x, edge_index)
        x = x[idx]
        out = self.mlp(x)
        return out
```

**Supplementary Code 3: PyTorch representative code for classification head used for disease-association and druggability prediction.**

```
class EmbeddingMLP(pl.LightningModule):
    def __init__(self, vocab_size, embedding_dim, lr=1e-3):
        super(EmbeddingMLP, self).__init__()
        self.embedding = nn.Embedding(num_embeddings=vocab_size,
embedding_dim=embedding_dim)
        self.fc = nn.Sequential(
            nn.Linear(embedding_dim, 2)
        )
        self.lr = lr

    def forward(self, x):
        x = x.to(torch.int32)
        embedded = self.embedding(x)
        embedded = embedded.mean(dim=1)
        linear_output = self.fc(embedded)
        softmax_output = F.log_softmax(linear_output, dim=1)
        return softmax_output
```

**Supplementary Code 4: PyTorch representative code for classification head used for prediction of PTM effect on protein-protein interactions.**

```
class TransformerClassifier(nn.Module):
    def __init__(self, dropout_rate=0.3, max_length=2000):
        super(TransformerClassifier, self).__init__()

        self.fc = nn.Sequential(
            nn.Linear(2 * max_length, max_length),
            nn.ReLU(),
            nn.Dropout(dropout_rate),
            nn.Linear(max_length, 1)
        )

    def forward(self, binder, wt, ptm):
        binder_wt = torch.cat([binder, wt], dim=-1)
        binder_ptm = torch.cat([binder, ptm], dim=-1)

        x = self.fc(binder_wt - binder_ptm)
        return x.squeeze(-1)
```

**Supplementary Table 1.** PTMs specifically represented in PTM-Mamba as new tokens.

| PTM Token                          | Annotation                                                       |
|------------------------------------|------------------------------------------------------------------|
| N-linked (GlcNAc...) asparagine    | Addition of N-acetylglucosamine to asparagine residues           |
| Pyrrolidone carboxylic acid        | Formation of a lactam ring from the N-terminal glutamine         |
| Phosphoserine                      | Addition of a phosphate group to serine residues                 |
| Phosphothreonine                   | Addition of a phosphate group to threonine residues              |
| N-acetylalanine                    | Acetylation of the N-terminal alanine                            |
| N-acetylmethionine                 | Acetylation of the N-terminal methionine                         |
| N6-acetyllysine                    | Acetylation of the lysine residue at the $\epsilon$ -amino group |
| Phosphotyrosine                    | Addition of a phosphate group to tyrosine residues               |
| S-diacylglycerol cysteine          | Attachment of diacylglycerol to cysteine residues                |
| N6-(pyridoxal phosphate)lysine     | Addition of pyridoxal phosphate to lysine residues               |
| N-acetylserine                     | Acetylation of the serine residue                                |
| N6-carboxyllysine                  | Carboxylation of the lysine residue                              |
| N6-succinyllysine                  | Succinylation of the lysine residue                              |
| S-palmitoyl cysteine               | Palmitoylation of cysteine residues                              |
| O-(pantetheine 4-phosphoryl)serine | Addition of pantetheine phosphate to serine residues             |
| Sulfotyrosine                      | Sulfation of tyrosine residues                                   |
| O-linked (GalNAc...) threonine     | Addition of N-acetylgalactosamine to threonine residues          |
| Omega-N-methylarginine             | Methylation of the arginine residue                              |
| N-myristoyl glycine                | Myristoylation of glycine residues                               |
| 4-hydroxyproline                   | Hydroxylation of proline residues                                |
| Asymmetric dimethylarginine        | Dimethylation of the arginine residue in an asymmetric manner    |
| N5-methylglutamine                 | Methylation of the glutamine residue                             |
| 4-aspartylphosphate                | Addition of a phosphate group to aspartate residues              |
| S-geranylgeranyl cysteine          | Attachment of geranylgeranyl to cysteine residues                |
| 4-carboxyglutamate                 | Carboxylation of glutamate residues                              |

**Supplementary Table 2.** Hyperparameters used for embedding benchmarking tasks.

| Benchmarking Task               | Optimizer | Learning Rate | # of Epochs | Batch Size |
|---------------------------------|-----------|---------------|-------------|------------|
| Phosphorylation Site Prediction | Adam      | 0.001         | 3           | 256        |
| NHAC Site Prediction            | Adam      | 0.00003       | 100         | 64         |
| Druggability Prediction         | Adam      | 0.001         | 2           | 1          |
| Disease-Association Prediction  | Adam      | 0.001         | 2           | 1          |
| PTM Effect on PPI Prediction    | AdamW     | 0.001         | 30          | 16         |
